# Supplementary material
Source: Research Square preprint supplement (doi:10.21203/rs.3.rs-9943118/v1)
Supplement: Supplementary file 1 [file 65606f2f6db420d1c49bd403.docx]

**Questionnaire:**

Dear Sir/Madame

You are invited to participate in a study investigating employment practices and labour market dynamics within the Egyptian hospitality industry. Your insights will contribute to understanding the challenges facing this vital sector and will inform potential solutions for a more stable and sustainable workforce. Your responses are completely anonymous and strictly confidential.

**Demographic Information**

Please tick (✓) or complete as appropriate.

**1.1** Age group:

- Under 25
- 25–34
- 35–44
- 45–54
- 55 and above

**1.2** Gender:

- Male
- Female

**1.3** Highest educational level:

- Secondary school or below
- Vocational / Technical diploma
- Bachelor's degree
- Postgraduate degree (Master's / Doctorate)

**1.4** Current job role / position: ____________________________

**1.5** Department:

- Front Office
- Housekeeping
- Food and Beverage outlets
- Kitchen
- Human Resources
- Other: __________________

**1.6** Length of service in current hotel:

- Less than 1 year
- 1–3 years
- 4–7 years
- 8–12 years
- More than 12 years

**1.7** Hotel star rating:

- 4-star
- 5-star

**1.8** City location of your hotel:

- Cairo
- Luxor
- Hurghada
- Sharm El-Sheikh

**1.9**. Employment Type

- Permenent (Based on a contract that is open or renewed yearly)
- Part-timer/Seasonal (Recruited during peak seasons only- Part Time Contract)

**Please Select the number that best reflects your level of agreement: 1 = Strongly Disagree, 2= Disagree, 3= Slightly Disagree, 4= Neutral, 5= Slightly Agree, 6= Agree, 7 = Strongly Agree.**

### Seasonal/Casual Hiring

| **Q** | **No.** | **Statement** | **1** | **2** | **3** | **4** | **5** | **6** | **7** |
| --- | --- | --- | --- | --- | --- | --- | --- | --- | --- |
| Q1 | SH1 | **I have noticed that the number of staff here changes a lot between peak season and low season.** |  |  |  |  |  |  |  |
| Q2 | SH2 | **We are informed that the hotel plans its staffing levels months in advance to prepare for peak season** |  |  |  |  |  |  |  |
| Q3 | SH3 | **I know that some staff only work here during certain times of the year.** |  |  |  |  |  |  |  |
| Q4 | SH4 | **I have observed that when occupancy is low, many workers are let go until the next season.** |  |  |  |  |  |  |  |
| Q5 | SH5 | **It seems to me that the hotel prefers to hire temporary staff rather than keep a large permanent team.** |  |  |  |  |  |  |  |
| Q6 | SH6 | **In departments that need more hands—like Food & Beverage and Housekeeping—extra workers are brought in only when the hotel is fully booked.** |  |  |  |  |  |  |  |

### **Violation of the State Minimum Wage Policy**

| **Q** | **No.** | **Statement** | **1** | **2** | **3** | **4** | **5** | **6** | **7** |
| --- | --- | --- | --- | --- | --- | --- | --- | --- | --- |
| Q7 | MW1 | **My cash salary is less than what I expected when newly joined.** |  |  |  |  |  |  |  |
| Q8 | MW2 | **The way we are paid here is similar to what staff would find in other hotels in this city.** |  |  |  |  |  |  |  |
| Q9 | MW3 | **I have noticed that the hotel counts meals and accommodation toward the minimum wage, but the cash we receive is much lower.** |  |  |  |  |  |  |  |
| Q10 | MW4 | **Even though the basic salary is below the minimum wage for many jobs here, I think the 12% service charge makes our total earnings fair.** |  |  |  |  |  |  |  |
| Q11 | MW5 | **If the 12% service charge were removed, I believe many staff would leave because the basic salary alone is below the minimum wage.** |  |  |  |  |  |  |  |
| Q12 | MW6 | **If the government strictly enforced the minimum wage law, I think this hotel would have to increase our basic salaries.** |  |  |  |  |  |  |  |

### **Deskilling**

| **Q** | **No.** | **Statement** | **1** | **2** | **3** | **4** | **5** | **6** | **7** |
| --- | --- | --- | --- | --- | --- | --- | --- | --- | --- |
| Q13 | DS1 | **I am able to fully use my skills and abilities in this job.** |  |  |  |  |  |  |  |
| Q14 | DS2 | **My daily work consists mainly of repetitive tasks that require little thought.** |  |  |  |  |  |  |  |
| Q15 | DS3 | **Off-the-job and on-the-job training teach me new skills, but repetitive tasks and rigid procedures hinder me from using them.** |  |  |  |  |  |  |  |
| Q16 | DS4 | **The training I receive here helps me keep my skills up to date.** |  |  |  |  |  |  |  |
| Q17 | DS5 | **I am rarely asked for my input on how to improve things.** |  |  |  |  |  |  |  |
| Q18 | DS6 | **I have to handle even small problems exactly as the manual says — not the way my experience suggests.** |  |  |  |  |  |  |  |

## **Employee Retention**

| **Q** | **No.** | **Statement** | **1** | **2** | **3** | **4** | **5** | **6** | **7** |
| --- | --- | --- | --- | --- | --- | --- | --- | --- | --- |
| Q19 | ER1 | **I see this hotel as a place where I can build a long-term career.** |  |  |  |  |  |  |  |
| Q20 | ER2 | **I have noticed that staff turnover is a significant challenge in this hotel.** |  |  |  |  |  |  |  |
| Q21 | ER3 | **From what I see, many employees here are constantly looking for better job opportunities elsewhere.** |  |  |  |  |  |  |  |
| Q22 | ER4 | **I often hear staff say they want to leave the hospitality industry entirely.** |  |  |  |  |  |  |  |
| Q23 | ER5 | **In my opinion, this hotel is good at retaining skilled workers.** |  |  |  |  |  |  |  |
| Q24 | ER6 | **I have seen many experienced and skilled colleagues leave this hotel.** |  |  |  |  |  |  |  |

**Employee Commitment**

| **Q** | **No.** | **Statement** | **1** | **2** | **3** | **4** | **5** | **6** | **7** |
| --- | --- | --- | --- | --- | --- | --- | --- | --- | --- |
| Q25 | EC1 | **I find the work I do here meaningful and motivating.** |  |  |  |  |  |  |  |
| Q26 | EC2 | **I feel proud to be part of this hotel, not just to say I work at a famous place.** |  |  |  |  |  |  |  |
| Q27 | EC3 | **I feel like I truly belong to a team here, not just a group of coworkers.** |  |  |  |  |  |  |  |
| Q28 | EC4 | **It would take a significant increase in pay to get me to leave this hotel** |  |  |  |  |  |  |  |
| Q29 | EC5 | **I would recommend this hotel as a great place to work.** |  |  |  |  |  |  |  |
| Q30 | EC6 | **I often see my colleagues give their best effort without expecting anything in return.** |  |  |  |  |  |  |  |

## **Service and Product Quality Inconsistency**

| **Q** | **No.** | **Statement** | **1** | **2** | **3** | **4** | **5** | **6** | **7** |
| --- | --- | --- | --- | --- | --- | --- | --- | --- | --- |
| Q31 | QI1 | **I have noticed that the quality of service is not the same every day.** |  |  |  |  |  |  |  |
| Q32 | QI2 | **During our daily briefings, we are often told that guests complain about inconsistent service depending on who is on shift.** |  |  |  |  |  |  |  |
| Q33 | QI3 | **From what I have observed, temporary or newly hired staff frequently struggle to meet service standards.** |  |  |  |  |  |  |  |
| Q34 | QI4 | **I often hear guests complain about service standards.** |  |  |  |  |  |  |  |
| Q35 | QI5 | **I have noticed that not all staff can handle service problems without guests complaining.** |  |  |  |  |  |  |  |
| Q36 | QI6 | **In my experience, new or temporary staff deliver different service than regular staff.** |  |  |  |  |  |  |  |

**Additional Comments (Optional)**

Please use the space below if you have any additional comments or observations regarding employment practices in the Egyptian hospitality industry:

_________________________________________________________________________________________________________________________________________________________________________________________________________________________________Thank you for your participation. Your insights are invaluable to this research.
