# Supplementary material
Source: Research Square preprint supplement (doi:10.21203/rs.3.rs-9943118/v1)
Supplement: Supplementary file 2 [file a59200cc3356ef19f26b8fdd.docx]

**Appendices**

**Interview Questions**

**Section A: Unified Competence Matrix**

**Current Skills Recognition and Standards**

1. How are staff competences currently assessed within your hotel?
2. To what extent do existing training programmes align with international hotel standards?

**Perceived Viability of a Unified Competence Matrix**

1. How feasible would it be to adopt a single, unified competence matrix across multiple five-star or across four-star hotels in Egypt?
2. Which job roles would benefit most from standardised competence matrix?
3. What adaptations would be required to make a unified matrix relevant to different city contexts (Cairo, Luxor, Hurghada, Sharm El-Sheikh)?

**Benefits and Value**

1. What advantages do you see in implementing a unified competence matrix?
2. Would the proposed unified competence matrix improve staff mobility, career progression, or service consistency? If yes, in what ways?

**Implementation Barriers**

1. What obstacles would you expect in introducing a unified competence matrix?
2. How would differences in brand standards across hotel chains be resoved?

**Section B: Employment Pooling System**

**Concept and Relevance**

1. What is your initial reaction to the concept of a shared, consortium-based employment pool for hospitality employees?
2. To what extent does this model address the labour market instability and turnover challenges?
3. Which staff categories (housekeeping, food and beverage, front office) would be most suitable to include in such a pool?

**Operational Viability and Governance**

1. How should the employment pool be structured and governed? Should it be led by hotel consortia, an independent body, or a public-private sectors partnership?
2. What can be done to manage the fair and timely deployment of pool employees across different hotels?
3. How can we deal with seasonal fluctuations and changing occupancy rates within the employment pool system?

**Funding and Financial Sustainability**

1. What is the best way to design the funding mechanism of the employment pool, particularly during periods of low demand or crisis?
2. Would your hotel be willing to make regular conributions to sustain such an initiative? If so, under what conditions?
3. What alternative funding models could ensure long-term sustainability?

**Opportunities and Value**

1. What are the strategic opportunities of an employment pooling system to the Egyptian hospitality industry?
2. Does this model help in reducing the drainage of skilled labour to the Gulf markets or other industries?
3. How can the pool enhance employer branding, destination competitiveness, or mitigate crisis resilience?

**Risks and Challenges**

1. What are your reservations regarding the employment pooling model?

**Contextual Adaptations**

1. Does the employment pooling model require unique adjustments depending on the city or nature of destination?
2. Is there any comment you would like to add regarding the viability, risks, or the potential of this proposal?
