# Supplementary material
Source: Research Square preprint supplement (doi:10.21203/rs.3.rs-9943118/v1)
Supplement: Supplementary file 3 [file d3aeaf8474f3bec5be4539ff.docx]

**Highlights**

- Seasonal hiring drives labor volatility and low retention in Egypt's hospitality.
- Minimum wage violations significantly reduce employee commitment and stability.
- An adaptive employment pooling model is proposed to stabilize labor supply.
- A unified competence matrix ensures transferable skills across hotel consortia.
- Consortium funding can mitigate crisis impacts and reduce skilled labor migration.
